# Supplementary material for: Chromosomal Evolution and Apomixis in the Cruciferous Tribe Boechereae
Source: Front Plant Sci. 2020 May 28;11:514. doi: 10.3389/fpls.2020.00514 (PMC7270200; doi:10.3389/fpls.2020.00514)
Supplement: Supplementary file 2 [file Table_1.XLS]

## Sheet: Supplementary Table S1
Supplementary Data
Mandáková et al.: Chromosomal evolution and apomixis in the cruciferous tribe Boechereae
Supplementary Table S1. Collection data of the species used in the present study. Multiple individuals were analyzed from each population.
Species	Tribe	Chromosome number (2n)	Ploidy level	Comparative chromosome painting	Embryology	Origin
Pennellia micrantha (A. Gray) Nieuwl.	Halimolobeae	16	diploid	+	-	coll. CD Bailey (s.n.); New Mexico, Grant Co., WSW of Haystack Mtn, 32.8584°N, 107.8778°W
Boechera formosa (Greene) Windham & Al-Shehbaz	Boechereae	14	diploid	+	+	coll. JGC (UT10006); Utah, Duchesne Co., Duchesne River Valley, 40°10’9.5”N, 110°19’40.1”W
Boechera gracilipes (Greene) Dorn		14	diploid	+	-	Millenium Seed Bank, accession no. 0269429; Arizona, Coconino Co., near Garden Springs SW of Flagstaff, 35.1302°N, 111.7356°W
Borodinia missouriensis (Greene) Al-Shehbaz		14	diploid	+	-	seeds provided by E. M. Schranz, accession ES1075
Boechera oxylobula (Greene) W.A. Weber		14	diploid	+	-	coll. MDW et al. (4493); Colorado, Park Co., SE edge of Fairplay, 39.2187°N 105.9942°W
Cusickiella douglasii (A. Gray) Rollins		28	autotetraploid	+	+	coll. MDW & LA (3362); Utah, Box Elder Co., NNE of Etna, 41°46'03'’N , 113°56'31'’W
Nevada holmgrenii (Rollins) N.H. Holmgren		14	diploid	+	+	coll. MDW et al. (4501); Nevada, Nye Co., SSW of Austin, 38.9473°N 117.3178°W
Phoenicaulis cheiranthoides Nutt.		14	diploid	+	+	coll. MDW et al. (4526); California, Mono Co., Lobdell Lake; Mandáková et al. 2020
Phoenicaulis cheiranthoides Nutt.		21	triploid	+	+	coll. MDW et al. (4522); California, Mono Co., Masonic Mt.; Mandáková et al. 2020
Phoenicaulis cheiranthoides Nutt.		21	triploid	+	+	coll. TM, MAL & MDW; California, Mono Co., Aurora Canyon; Mandáková et al. 2020
Phoenicaulis cheiranthoides Nutt.		28	autotetraploid	+	+	coll. MDW et al. (4510); California, Inyo Co., Bishop Creek; Mandáková et al. 2020
Phoenicaulis cheiranthoides Nutt.		28	autotetraploid	+	+	coll. MDW (3097); Nevada, Elko Co., Angel Lake; Mandáková et al. 2020
Phoenicaulis cheiranthoides Nutt.		28	autotetraploid	-	+	coll. MDW (3129); Oregon, Harney Co., Big Indian; Mandáková et al. 2020
Polyctenium fremontii (S. Watson) Greene		28	autotetraploid	+	+	seeds provided by E. M. Schranz, accession ES1078
Polyctenium fremontii (S. Watson) Greene		28	autotetraploid	-	+	coll. MDW (2055); Idaho, Gooding Co., NW of Shoshone, 43°11'42''N, 114°36'32''W
Sandbergia perplexa (L.F. Hend.) Al-Shehbaz		14	diploid	+	+	coll. TM & MAL; Idaho, Lemhi Co., along Squaw Creek 1.3 air mi NW of Salmon River; 45.4034°N, 114.1794°W
Sandbergia whitedii (Piper) Greene		21	triploid	+	+	seeds provided by E. M. Schranz, accession ES1080; Washington, Chelan Co., Chelan Butte, 47°48.323'N, 120°02.264'W
Sandbergia whitedii (Piper) Greene		?	?	-	+	coll. TM & MAL (s.n.); Washington, Chelan Co., Chelan Butte, 47.8025°N, 120.0401°W
Mandáková, T., Ashby, K., Price, B. J., Windham, M. D., Carman, J. G., & Lysak, M. A. 2020. Genome structure and apomixis in Phoenicaulis (Brassicaceae; Boechereae). Journal of Systematics and Evolution. https://doi.org/10.1111/jse.12555
JGC: John C Carman
MAL: Martin A Lysak
TM: Terezie Mandáková
MDW: Michael D Windham

## Sheet: Supplementary Table S2
Supplementary Table S2. Genome structure of Pennellia micrantha (2n = 14, Halimolobeae). Ancestral genomic blocks (GBs, A-X) of the ancestral Crucifer Karyotype (ACK; Lysak et al., 2016) identified on P. micrantha chromosomes (Hal1-Hal7).
Details of corresponding arabidopsis gene loci and BAC contigs are given (TAIR, www.arabidopsis.org).
	At	GB	Block borders				Length of the region	Position
			Start		End		(bp)	of centromere
			Gene	BAC clone (GenBank Accession)	Gene	BAC clone (GenBank Accession)
Hal1	At1	A	At1g02300	T7I23 (U89959)	At1g01010	T25K16 (AC007323)	460000
	At1	A	At1g02440	T14P4 (AC022521)	At1g19835	F14P1 (AC024609)	6370000
	At1	B	At1g19670	F6F9 (AC007797)	At1g24095	T23E23 (AC002423)	1720000
	At1	B	At1g26976	T2P11 (AC005508)	At1g24096	F5A9 (AC004133)	650000
	At1	B	At1g27220	F17L21 (AC004557)	At1g34640	F12K21 (AC023279)	3280000	cen
	At1	C	At1g43650	F2J6 (AC009526)	At1g56180	T6H22 (AC009894)	4590000
Hal2	At1	D	At1g64700	F1N19 (AC009519)	At1g56140	F14G9 (AC069159)	3050000	cen
	At1	E	At1g64690	F13O11 (AC006193)	At1g80990	F23A5 (AC011713)	6390000
Hal3	At3	F	At3g02020	F28J7 (AC010797)	At3g01010	T4P13 (AC008261)	340000
	At3	F	At3g01870	F1C9 (AC011664)	At3g25580	MWL2 (AB025639)	8990000
	At2	G	At2g05350	F16J10 (AC007289)	At2g07215	T25N22 (AC005693)	1060000	cen
	At2	H	At2g13463	T10F5 (AC007063)	At2g21045	F5H14 (AC006234)	3420000
Hal4	At2	I	At2g21220	F7O24 (AC007142)	At2g26170	T19L18 (AC004747)	2060000	cen
	At2	J	At2g26340	T9J22 (AC002505)	At2g47400	T8I13 (AC002337)	8240000
Hal5	At2	K-L	At2g01400	F2I9 (AC005560)	At2g04032	F3C11 (AC007167)	1120000
	At3	K-L	At3g25590	T5M7(AP001313)	At3g30730	T4A2 (AP002066)	3070000	cen
	At3	M-N	At3g44220	T10D17 (AL353865)	At3g63375	F16M2 (AL138648)	7490000
Hal6	At4	O	At4g00026	F6N15 (AF069299)	At4g03566	F9H3 (AF071527)	1590000
	At4	O	At4g04957	T1J1 (AF128393)	At4g04180	T27D20 (AF076274)	530000
	At4	P	At4g12640	T1P17 (AL049730)	At4g08870	T3H13 (AF128396)	1820000	cen
	At5	Q	At5g28340	T8M17 (AF296835)	At5g22990	T20O7 (AB026660)	2630000
	At5	R	At5g22980	MRN17 (AB005243)	At5g01015	F7J8 (AL137189)	7700000
Hal7	At5	S	At5g41500	MPK23 (AB020748)	At5g36780	F5H8 (AB025605)	2140000	cen
	At4	T	At4g12670	T20K18 (AL049640)	At4g13920	F18A5 (AL035528)	580000
	At4	U	At4g17840	T6K21 (AL021889)	At4g38340	F20D10 (AL035538)	8040000
	At4	U	At4g40085	T5J17 (AL035708)	At4g38250	F22I13 (AL035539)	540000
Hal8	At5	V	At5g47690	MGC1 (AB028612)	At5g41910	MJC20 (AB017067)	2550000	cen
	At5	W	At5g47930	K16F13 (AB024025)	At5g60750	MUP24 (AB005246)	5030000
	At5	X	At5g60890	MSL3 (AB008269)	At5g67640	K9I9 (AB013390)	2490000

## Sheet: Supplementary Table S3
Supplementary Table S3. Genome structure of the ancestral Boechereae genome (n = 7, chromosomes Boe1-Boe7), Boechera gracilipes (2n = 14) and Polyctenium fremontii (2n = 28).
As the two subgenomes are identical in tetraploid P. fremontii, ancestral GBs identified on chromosomes of only one subgenome are presented. Details of corresponding arabidopsis gene loci and BAC contigs are given.
	At	GB	Block borders				Length of the region	Position
			Start		End		(bp)	of centromere
			Gene	BAC clone (GenBank Accession)	Gene	BAC clone (GenBank Accession)
Boe1	At1	Aa	At1g02300	T7I23 (U89959)	At1g01010	T25K16 (AC007323)	460000
	At1	Aa	At1g02440	T14P4 (AC022521)	At1g13620	F13B4 (AC027134)	4180000
	At1	Ca	At1g53170	F8L10 (AC022520)	At1g43650	F2J6 (AC009526)	3380000	cen
	At1	D	At1g64700	F1N19 (AC009519)	At1g56140	F14G9 (AC069159)	3050000
Boe2	At1	Cb	At1g56180	T6H22 (AC009894)	At1g53160	F12M16 (AC008007)	1230000
	At1	Ab	At1g15410	T16N11 (AC013453)	At1g19630	F18O14 (AC025808)	1490000
	At1	B	At1g19670	F6F9 (AC007797)	At1g24095	T23E23 (AC002423)	1720000
	At1	B	At1g26976	T2P11 (AC005508)	At1g24096	F5A9 (AC004133)	650000
	At1	B	At1g27220	F17L21 (AC004557)	At1g34640	F12K21 (AC023279)	3280000	cen
	At1	E	At1g64690	F13O11 (AC006193)	At1g80990	F23A5 (AC011713)	6390000
Boe3	At3	F	At3g02020	F28J7 (AC010797)	At3g01010	T4P13 (AC008261)	340000
	At3	F	At3g01870	F1C9 (AC011664)	At3g25580	MWL2 (AB025639)	8990000
	At2	G	At2g05350	F16J10 (AC007289)	At2g07215	T25N22 (AC005693)	1060000	cen
	At5	W	At5g47930	K16F13 (AB024025)	At5g60750	MUP24 (AB005246)	5030000
	At5	X	At5g60890	MSL3 (AB008269)	At5g67640	K9I9 (AB013390)	2490000
Boe4	At2	I	At2g21220	F7O24 (AC007142)	At2g26170	T19L18 (AC004747)	2060000	cen
	At2	J	At2g26340	T9J22 (AC002505)	At2g47400	T8I13 (AC002337)	8240000
Boe5	At5	V	At5g47690	MGC1 (AB028612)	At5g41910	MJC20 (AB017067)	2550000	cen
	At2	H	At2g13463	T10F5 (AC007063)	At2g21045	F5H14 (AC006234)	3420000
	At2	K-L	At2g01400	F2I9 (AC005560)	At2g04032	F3C11 (AC007167)	1120000
	At3	K-L	At3g25590	T5M7(AP001313)	At3g30730	T4A2 (AP002066)	3070000
	At3	M-N	At3g44220	T10D17 (AL353865)	At3g63375	F16M2 (AL138648)	7490000
Boe6	At4	O	At4g00026	F6N15 (AF069299)	At4g03566	F9H3 (AF071527)	1590000
	At4	O	At4g04957	T1J1 (AF128393)	At4g04180	T27D20 (AF076274)	530000
	At4	P	At4g12640	T1P17 (AL049730)	At4g08870	T3H13 (AF128396)	1820000	cen
	At5	Q	At5g28340	T8M17 (AF296835)	At5g22990	T20O7 (AB026660)	2630000
	At5	R	At5g22980	MRN17 (AB005243)	At5g01015	F7J8 (AL137189)	7700000
Boe7	At5	S	At5g41500	MPK23 (AB020748)	At5g36780	F5H8 (AB025605)	2140000	cen
	At4	T	At4g12670	T20K18 (AL049640)	At4g13920	F18A5 (AL035528)	580000
	At4	U	At4g17840	T6K21 (AL021889)	At4g38340	F20D10 (AL035538)	8040000
	At4	U	At4g40085	T5J17 (AL035708)	At4g38250	F22I13 (AL035539)	540000

## Sheet: Supplementary Table S4
Supplementary Table S6. Genome structure of Phoenicaulis cheiranthoides (2n = 2x = 14, 2n = 3x = 21, 2n = 4x = 28; Mandáková et al. 2019), Sandbergia perplexa (2n = 2x = 14) and S. whitedii (2n = 3x = 21).
As the (sub)genome structure of the diploid, triploid and tetraploid Phoenicaulis and Sandbergia taxa are identical, ancestral GBs identified on chromosomes of only one (sub)genome are presented (Boe1-Bo7).
Details of corresponding arabidopsis gene loci and BAC contigs are given.
	At	GB	Block borders				Length of the region	Position
			Start		End		(bp)	of centromere
			Gene	BAC clone (GenBank Accession)	Gene	BAC clone (GenBank Accession)
Boe1	At1	Aa	At1g02300	T7I23 (U89959)	At1g01010	T25K16 (AC007323)	460000
	At1	Aa	At1g02440	T14P4 (AC022521)	At1g13620	F13B4 (AC027134)	4180000
	At1	Ca	at1g53170	F8L10 (AC022520)	At1g43650	F2J6 (AC009526)	3380000	cen
	At1	D	At1g64700	F1N19 (AC009519)	At1g56140	F14G9 (AC069159)	3050000
Boe2	At1	Cb	At1g56180	T6H22 (AC009894)	At1g53160	F12M16 (AC008007)	1230000
	At1	Ab	At1g15410	T16N11 (AC013453)	At1g19630	F18O14 (AC025808)	1490000
	At1	B	At1g19670	F6F9 (AC007797)	At1g24095	T23E23 (AC002423)	1720000
	At1	B	At1g26976	T2P11 (AC005508)	At1g24096	F5A9 (AC004133)	650000
	At1	B	At1g27220	F17L21 (AC004557)	At1g34640	F12K21 (AC023279)	3280000	cen
	At1	E	At1g64690	F13O11 (AC006193)	At1g80990	F23A5 (AC011713)	6390000
Boe3	At3	F	At3g02020	F28J7 (AC010797)	At3g01010	T4P13 (AC008261)	340000
	At3	F	At3g01870	F1C9 (AC011664)	At3g25580	MWL2 (AB025639)	8990000
	At2	G	At2g05350	F16J10 (AC007289)	At2g07215	T25N22 (AC005693)	1060000	cen
	At5	W	At5g47930	K16F13 (AB024025)	At5g60750	MUP24 (AB005246)	5030000
	At5	X	At5g60890	MSL3 (AB008269)	At5g67640	K9I9 (AB013390)	2490000
Boe4	At2	I	At2g21220	F7O24 (AC007142)	At2g26170	T19L18 (AC004747)	2060000	cen
	At2	J	At2g47400	T8I13 (AC002337)	At2g26340	T9J22 (AC002505)	8240000
Boe5	At5	V	At5g47690	MGC1 (AB028612)	At5g41910	MJC20 (AB017067)	2550000	cen
	At2	H	At2g13463	T10F5 (AC007063)	At2g21045	F5H14 (AC006234)	3420000
	At2	K-L	At2g01400	F2I9 (AC005560)	At2g04032	F3C11 (AC007167)	1120000
	At3	K-L	At3g25590	T5M7(AP001313)	At3g30730	T4A2 (AP002066)	3070000
	At3	M-N	At3g44220	T10D17 (AL353865)	At3g63375	F16M2 (AL138648)	7490000
Boe6	At4	O	At4g00026	F6N15 (AF069299)	At4g03566	F9H3 (AF071527)	1590000
	At4	O	At4g04957	T1J1 (AF128393)	At4g04180	T27D20 (AF076274)	530000
	At4	P	At4g12640	T1P17 (AL049730)	At4g08870	T3H13 (AF128396)	1820000	cen
	At5	Q	At5g28340	T8M17 (AF296835)	At5g22990	T20O7 (AB026660)	2630000
	At5	R	At5g22980	MRN17 (AB005243)	At5g01015	F7J8 (AL137189)	7700000
Boe7	At5	S	At5g41500	MPK23 (AB020748)	At5g36780	F5H8 (AB025605)	2140000	cen
	At4	T	At4g12670	T20K18 (AL049640)	At4g13920	F18A5 (AL035528)	580000
	At4	U	At4g17840	T6K21 (AL021889)	At4g38340	F20D10 (AL035538)	8040000
	At4	U	At4g40085	T5J17 (AL035708)	At4g38250	F22I13 (AL035539)	540000

## Sheet: Supplementary Table S5
Supplementary Table S8. Genome structure of Nevada holmgrenii (2n = 14). Details of corresponding arabidopsis gene loci and BAC contigs are given.
	At	GB	Block borders				Length of the region	Position
			Start		End		(bp)	of centromere
			Gene	BAC clone (GenBank Accession)	Gene	BAC clone (GenBank Accession)
Boe1	At1	Aa	At1g02300	T7I23 (U89959)	At1g01010	T25K16 (AC007323)	460000
	At1	Aa	At1g02440	T14P4 (AC022521)	At1g13620	F13B4 (AC027134)	4180000
	At1	Ca	at1g53170	F8L10 (AC022520)	At1g43650	F2J6 (AC009526)	3380000	cen
	At1	D	At1g64700	F1N19 (AC009519)	At1g56140	F14G9 (AC069159)	3050000
Boe2	At1	Cb	At1g56180	T6H22 (AC009894)	At1g53160	F12M16 (AC008007)	1230000
	At1	Ab	At1g15410	T16N11 (AC013453)	At1g19630	F18O14 (AC025808)	1490000
	At1	B	At1g19670	F6F9 (AC007797)	At1g24095	T23E23 (AC002423)	1720000
	At1	B	At1g26976	T2P11 (AC005508)	At1g24096	F5A9 (AC004133)	650000
	At1	B	At1g27220	F17L21 (AC004557)	At1g34640	F12K21 (AC023279)	3280000	cen
	At1	E	At1g64690	F13O11 (AC006193)	At1g80990	F23A5 (AC011713)	6390000
Boe3	At3	F	At3g02020	F28J7 (AC010797)	At3g01010	T4P13 (AC008261)	340000
	At3	F	At3g01870	F1C9 (AC011664)	At3g25580	MWL2 (AB025639)	8990000
	At2	G	At2g05350	F16J10 (AC007289)	At2g07215	T25N22 (AC005693)	1060000	cen
	At5	W	At5g47930	K16F13 (AB024025)	At5g60750	MUP24 (AB005246)	5030000
	At5	X	At5g60890	MSL3 (AB008269)	At5g67640	K9I9 (AB013390)	2490000
Boe4	At2	I	At2g21220	F7O24 (AC007142)	At2g26170	T19L18 (AC004747)	2060000	cen
	At2	J	At2g47400	T8I13 (AC002337)	At2g26340	T9J22 (AC002505)	8240000
Boe5	At5	V	At5g41910	MJC20 (AB017067)	At5g47690	MGC1 (AB028612)	2550000	telocentric
	At2	H	At2g13463	T10F5 (AC007063)	At2g21045	F5H14 (AC006234)	3420000
	At2	K-L	At2g01400	F2I9 (AC005560)	At2g04032	F3C11 (AC007167)	1120000
	At3	K-L	At3g25590	T5M7(AP001313)	At3g30730	T4A2 (AP002066)	3070000
	At3	M-N	At3g44220	T10D17 (AL353865)	At3g63375	F16M2 (AL138648)	7490000
Boe6	At4	O	At4g00026	F6N15 (AF069299)	At4g03566	F9H3 (AF071527)	1590000
	At4	O	At4g04957	T1J1 (AF128393)	At4g04180	T27D20 (AF076274)	530000
	At4	P	At4g12640	T1P17 (AL049730)	At4g08870	T3H13 (AF128396)	1820000	cen
	At5	Q	At5g28340	T8M17 (AF296835)	At5g22990	T20O7 (AB026660)	2630000
	At5	R	At5g22980	MRN17 (AB005243)	At5g01015	F7J8 (AL137189)	7700000
Boe7	At5	S	At5g41500	MPK23 (AB020748)	At5g36780	F5H8 (AB025605)	2140000	cen
	At4	T	At4g12670	T20K18 (AL049640)	At4g13920	F18A5 (AL035528)	580000
	At4	U	At4g17840	T6K21 (AL021889)	At4g38340	F20D10 (AL035538)	8040000
	At4	U	At4g40085	T5J17 (AL035708)	At4g38250	F22I13 (AL035539)	540000

## Sheet: Supplementary Table S6
Supplementary Table S9. Genome structure of Cusickiella douglasii (2n = 4x = 28). As the two subgenomes are identical in the tetraploid Cusickiella, ancestral GBs identified on chromosomes of only one subgenome are presented (Boe1-Bo7).
Details of corresponding arabidopsis gene loci and BAC contigs are given.
	At	GB	Block borders				Length of the region	Position
			Start		End		(bp)	of centromere
			Gene	BAC clone (GenBank Accession)	Gene	BAC clone (GenBank Accession)
Boe1	At1	Aa	At1g02300	T7I23 (U89959)	At1g01010	T25K16 (AC007323)	460000
	At1	Aa	At1g02440	T14P4 (AC022521)	At1g13620	F13B4 (AC027134)	4180000
	At1	Ca	at1g53170	F8L10 (AC022520)	At1g43650	F2J6 (AC009526)	3380000	cen
	At1	D	At1g64700	F1N19 (AC009519)	At1g56140	F14G9 (AC069159)	3050000
Boe2	At1	Cb	At1g56180	T6H22 (AC009894)	At1g53160	F12M16 (AC008007)	1230000
	At1	Ab	At1g15410	T16N11 (AC013453)	At1g19630	F18O14 (AC025808)	1490000
	At1	B	At1g19670	F6F9 (AC007797)	At1g24095	T23E23 (AC002423)	1720000
	At1	B	At1g26976	T2P11 (AC005508)	At1g24096	F5A9 (AC004133)	650000
	At1	B	At1g27220	F17L21 (AC004557)	At1g34640	F12K21 (AC023279)	3280000	cen
	At1	E	At1g64690	F13O11 (AC006193)	At1g80990	F23A5 (AC011713)	6390000
Boe3	At3	F	At3g02020	F28J7 (AC010797)	At3g01010	T4P13 (AC008261)	340000
	At3	F	At3g01870	F1C9 (AC011664)	At3g25580	MWL2 (AB025639)	8990000
	At2	G	At2g05350	F16J10 (AC007289)	At2g07215	T25N22 (AC005693)	1060000	cen
	At5	W	At5g47930	K16F13 (AB024025)	At5g60750	MUP24 (AB005246)	5030000
	At5	X	At5g60890	MSL3 (AB008269)	At5g67640	K9I9 (AB013390)	2490000
	At2	I	At2g26170	T19L18 (AC004747)	At2g21220	F7O24 (AC007142)	2060000	telocentric chromosome
	At2	J	at2g40090	T28M21 (AF002109)	At2g31957	F22D22 (F22D22)	3150000
	At2	J	at2g31500	T28P16 (AC007169)	At2g26340	T9J22 (AC002505)	2200000
	At2	J	At2g40240	T3G21 (AC007020)	At2g47400	T8I13 (AC002337)	2640000
Boe5	At5	V	At5g47690	MGC1 (AB028612)	At5g41910	MJC20 (AB017067)	2550000	cen
	At2	H	At2g13463	T10F5 (AC007063)	At2g21045	F5H14 (AC006234)	3420000
	At2	K-L	At2g01400	F2I9 (AC005560)	At2g04032	F3C11 (AC007167)	1120000
	At3	K-L	At3g25590	T5M7(AP001313)	At3g30730	T4A2 (AP002066)	3070000
	At3	M-N	At3g44220	T10D17 (AL353865)	At3g63375	F16M2 (AL138648)	7490000
Boe6	At4	O	At4g00026	F6N15 (AF069299)	At4g03566	F9H3 (AF071527)	1590000
	At4	O	At4g04957	T1J1 (AF128393)	At4g04180	T27D20 (AF076274)	530000
	At4	P	At4g12640	T1P17 (AL049730)	At4g08870	T3H13 (AF128396)	1820000	cen
	At5	Q	At5g28340	T8M17 (AF296835)	At5g22990	T20O7 (AB026660)	2630000
	At5	R	At5g22980	MRN17 (AB005243)	At5g01015	F7J8 (AL137189)	7700000
Boe7	At5	S	At5g41500	MPK23 (AB020748)	At5g36780	F5H8 (AB025605)	2140000	cen
	At4	T	At4g12670	T20K18 (AL049640)	At4g13920	F18A5 (AL035528)	580000
	At4	U	At4g17840	T6K21 (AL021889)	At4g38340	F20D10 (AL035538)	8040000
	At4	U	At4g40085	T5J17 (AL035708)	At4g38250	F22I13 (AL035539)	540000

## Sheet: Supplementary Table S7
Supplementary Table S10. Genome structure of Boechera formosa and B. oxylobula (2n = 14).
Details of corresponding arabidopsis gene loci and BAC contigs are given.
	At	GB	Block borders				Length of the region	Position
			Start		End		(bp)	of centromere
			Gene	BAC clone (GenBank Accession)	Gene	BAC clone (GenBank Accession)
Boe1	At1	Aa	At1g02300	T7I23 (U89959)	At1g01010	T25K16 (AC007323)	460000
	At1	Aa	At1g02440	T14P4 (AC022521)	At1g13620	F13B4 (AC027134)	4180000
	At1	Ca	at1g53170	F8L10 (AC022520)	At1g43650	F2J6 (AC009526)	3380000	cen
	At1	D	At1g64700	F1N19 (AC009519)	At1g56140	F14G9 (AC069159)	3050000
Boe2	At1	Cb	At1g56180	T6H22 (AC009894)	At1g53160	F12M16 (AC008007)	1230000
	At1	Ab	At1g15410	T16N11 (AC013453)	At1g19630	F18O14 (AC025808)	1490000
	At1	B	At1g19670	F6F9 (AC007797)	At1g24095	T23E23 (AC002423)	1720000
	At1	B	At1g26976	T2P11 (AC005508)	At1g24096	F5A9 (AC004133)	650000
	At1	B	At1g27220	F17L21 (AC004557)	At1g34640	F12K21 (AC023279)	3280000	cen
	At1	E	At1g64690	F13O11 (AC006193)	At1g80990	F23A5 (AC011713)	6390000
Boe3	At3	F	At3g02020	F28J7 (AC010797)	At3g01010	T4P13 (AC008261)	340000
	At3	F	At3g01870	F1C9 (AC011664)	At3g25580	MWL2 (AB025639)	8990000
	At2	G	At2g05350	F16J10 (AC007289)	At2g07215	T25N22 (AC005693)	1060000	cen
	At5	W	At5g47930	K16F13 (AB024025)	At5g60750	MUP24 (AB005246)	5030000
	At5	X	At5g60890	MSL3 (AB008269)	At5g67640	K9I9 (AB013390)	2490000
Boe4	At2	I	At2g21220	F7O24 (AC007142)	At2g26170	T19L18 (AC004747)	2060000	cen
	At2	J	At2g26340	T9J22 (AC002505)	At2g47400	T8I13 (AC002337)	8240000
Boe5	At5	Va	At5g47690	MGC1 (AB028612)	At5g47150	MQL5 (AB025628)	180000	cen
	At3	K-La	At3g30655	MQP15 (AB016878)	At3g25590	T5M7 (AP001313)	2910000
	At2	K-La	At2g04032	F3C11 (AC007167)	At2g01400	F2I9 (AC005560)	1120000
	At2	H	At2g21045	F5H14 (AC006234)	At2g13463	T10F5 (AC007063)	3420000	cen
	At5	Vb	At5g41910	MJC20 (AB017067)	At5g47175	K14A3 (AB025609)	2380000
	At3	K-Lb	At3g30663	MED5 (AB026642)	At3g30730	T4A2 (AP002066)	4660000
	At3	M-N	At3g44220	T10D17 (AL353865)	At3g63375	F16M2 (AL138648)	7490000
Boe6	At4	O	At4g00026	F6N15 (AF069299)	At4g03566	F9H3 (AF071527)	1590000
	At4	O	At4g04957	T1J1 (AF128393)	At4g04180	T27D20 (AF076274)	530000
	At4	P	At4g12640	T1P17 (AL049730)	At4g08870	T3H13 (AF128396)	1820000	cen
	At5	Q	At5g28340	T8M17 (AF296835)	At5g22990	T20O7 (AB026660)	2630000
	At5	R	At5g22980	MRN17 (AB005243)	At5g01015	F7J8 (AL137189)	7700000
Boe7	At5	S	At5g41500	MPK23 (AB020748)	At5g36780	F5H8 (AB025605)	2140000	cen
	At4	T	At4g12670	T20K18 (AL049640)	At4g13920	F18A5 (AL035528)	580000
	At4	U	At4g17840	T6K21 (AL021889)	At4g38340	F20D10 (AL035538)	8040000
	At4	U	At4g40085	T5J17 (AL035708)	At4g38250	F22I13 (AL035539)	540000

## Sheet: Supplementary Table S8
Supplementary Table S12. Genome structure of Borodinia missouriensis (2n = 14).
Details of corresponding arabidopsis gene loci and BAC contigs are given.
	At	GB	Block borders				Length of the region	Position
			Start		End		(bp)	of centromere
			Gene	BAC clone (GenBank Accession)	Gene	BAC clone (GenBank Accession)
Boe1	At1	Aa	At1g02300	T7I23 (U89959)	At1g01010	T25K16 (AC007323)	460000
	At1	Aa	At1g02440	T14P4 (AC022521)	At1g13620	F13B4 (AC027134)	4180000
	At1	Ca	at1g53170	F8L10 (AC022520)	At1g43650	F2J6 (AC009526)	3380000	cen
	At2	G	At2g07215	T25N22 (AC005693)	At2g05350	F16J10 (AC007289)	1060000
	At3	F	At3g25580	MWL2 (AB025639)	At3g01870	F1C9 (AC011664)	8990000
	At3	F	At3g01010	T4P13 (AC008261)	At3g02020	F28J7 (AC010797)	340000
Boe2	At1	Cb	At1g56180	T6H22 (AC009894)	At1g53160	F12M16 (AC008007)	1230000
	At1	Ab	At1g15410	T16N11 (AC013453)	At1g19630	F18O14 (AC025808)	1490000
	At1	B	At1g19670	F6F9 (AC007797)	At1g24095	T23E23 (AC002423)	1720000
	At1	B	At1g26976	T2P11 (AC005508)	At1g24096	F5A9 (AC004133)	650000
	At1	B	At1g27220	F17L21 (AC004557)	At1g34640	F12K21 (AC023279)	3280000	cen
	At1	E	At1g64690	F13O11 (AC006193)	At1g80990	F23A5 (AC011713)	6390000
Boe3	At1	D	At1g56140	F14G9 (AC069159)	At1g64700	F1N19 (AC009519)	3050000	cen
	At5	W	At5g47930	K16F13 (AB024025)	At5g60750	MUP24 (AB005246)	5030000
	At5	X	At5g60890	MSL3 (AB008269)	At5g67640	K9I9 (AB013390)	2490000
Boe4	At2	I	At2g21220	F7O24 (AC007142)	At2g26170	T19L18 (AC004747)	2060000	cen
	At2	J	At2g26340	T9J22 (AC002505)	At2g47400	T8I13 (AC002337)	8240000
Boe5	At5	Vb	At5g41910	MJC20 (AB017067)	At5g43211	K24F5 (AB023030)	570000	cen
	At5	Va	At5g43190	MNL12 (AB017070)	At5g47690	MGC1 (AB028612)	1990000
	At2	H	At2g13463	T10F5 (AC007063)	At2g21045	F5H14 (AC006234)	3420000
	At2	K-L	At2g01400	F2I9 (AC005560)	At2g04032	F3C11 (AC007167)	1120000
	At3	K-L	At3g25590	T5M7(AP001313)	At3g30730	T4A2 (AP002066)	3070000
	At3	M-N	At3g44220	T10D17 (AL353865)	At3g63375	F16M2 (AL138648)	7490000
Boe6	At4	O	At4g00026	F6N15 (AF069299)	At4g03566	F9H3 (AF071527)	1590000
	At4	O	At4g04957	T1J1 (AF128393)	At4g04180	T27D20 (AF076274)	530000
	At4	P	At4g12640	T1P17 (AL049730)	At4g08870	T3H13 (AF128396)	1820000	cen
	At5	Q	At5g28340	T8M17 (AF296835)	At5g22990	T20O7 (AB026660)	2630000
	At5	R	At5g22980	MRN17 (AB005243)	At5g01015	F7J8 (AL137189)	7700000
Boe7	At5	S	At5g41500	MPK23 (AB020748)	At5g36780	F5H8 (AB025605)	2140000	cen
	At4	T	At4g12670	T20K18 (AL049640)	At4g13920	F18A5 (AL035528)	580000
	At4	U	At4g17840	T6K21 (AL021889)	At4g38340	F20D10 (AL035538)	8040000
	At4	U	At4g40085	T5J17 (AL035708)	At4g38250	F22I13 (AL035539)	540000
